# Supplementary material
Source: PubMed Central journal article supplement (PMC1142420)

**A**

## C3HC4 RING finger domain

XXXXXXXXXXDXKCPXCKTDRYLNPXXXXLLVNPCEYHXXCESCVDRIFXXGPAQCPXXGXCKILRKXKFRXQXFPEDXXVEK

10 20 30 40 50 60 70 80

Pmh1 1 MDDEGARKVDEKCPDCAQRYLNPNMKLLINPECYHKMCECSCVDRIFFTTPGAQCPPTPGONKILRKAKFRQCFDFDAQTFR  
 Tfb3 1 MLMDEYEENNDMCPICTKTDRYLSQDVKELVNPECYHRI CESCVDRIFFSLGPAQCPYKGCCKILRKXKFRKFTCFDFDVEVEK  
 Mat1 1 -----MDDQGCPRCKTKFYRNP SLKIMVN-VGSHFLCECSCVDLIFVRGAGNCP--ECGTPLRKXSNFRVCFDFDPTVDK

## coiled-coil region

EVDIRKRVXXIFNKXXXDFX-SLXEYNDYLEEVEVIXIFNLXXXIDVEXTEEEKXXXVEKXNKDXIXNXXXXXXXXXXEXXLEQ

90 100 110 120 130 140 150 160

Pmh1 81 EVDVRRKISRIFNKGQEPD-SLQAVNDYLEEVEVITLNFNTYKRDVRFPEEKVKQVEKQNRDSTAAANSARAAAFARTLAC  
 Tfb3 81 EVDTRKRVFNVENKTIIDDPNGDLEVEYKRVLEEVDDIYKEDHGIDVAKTEEKLRTVPELKNQILMNNLBRSRRTIESFEQ  
 Mat1 71 EVDIRKRVKILVYKREEDFP-SLREYNDYLEEVEVITLNFNTNNVDFENKIKKIMELVQKPNKDLVQKNKLLRREQDFEE

XXXXXXXXXXRLLXXXXEEXEXXKEXXQXIXXXLXTSXXDXNXXXXXXXXXX---XXXEXXXXXXXXXXXXXSSXXXLSXX

170 180 190 200 210 220 230 240

Pmh1 160 NEILLRQKQEARFAAIRRQKQKERRQVEQOLIFDLAISGKDPNKIIQLSDSLKQQQNTIASSVSNISRSSSILLSDV  
 Tfb3 161 RQKFEKEMKKRLLERQTEPEERMNKQWTKKELVNRLSITTTQDIN-----ETIEGVKNTVKKLKKSSARRKFEEL  
 Mat1 150 ALEVERQGEHQRLFIQKPEELQALKRKNKCAFLEDESSDLPVALLAQHK--DRSTQLEMQLKPRSMKPVTFSTG

XXXXXXXXXXXXXXXXXXEYFXXXXNTXXXXXEVXXXPXX---XXXXXXXXXXXXXXXXFXGXIXLXLRLXIXXAX-

250 260 270 280 290 300 310 320

Pmh1 240 QQVAEDTTPFSPLAGKRDGSKVYFSYKNTYQDLYLRFVSHPEGRKCGFRIEDCHLRCLLYEAFSGTIDYDLESKKLEVAS  
 Tfb3 231 NRVLKNPP-----VFNENVIVQNSRLKDAVPTFT-----ENVIEKHTQGR-----  
 Mat1 227 TKMGQQISLAPIQKLEALYEYQPLQIEVCGPQVPEQLLGRLG---YLNHVRAASPQDLAGVYSSVACHRAVQDAFS

-----

Pmh1 318  
 Tfb3 271  
 Mat1 303 GLFWQPR

**B**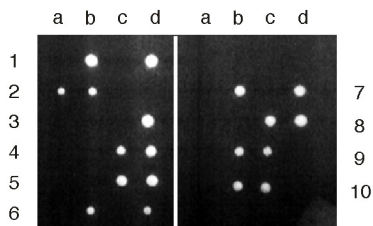**C**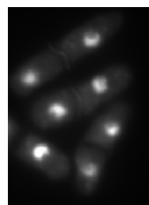

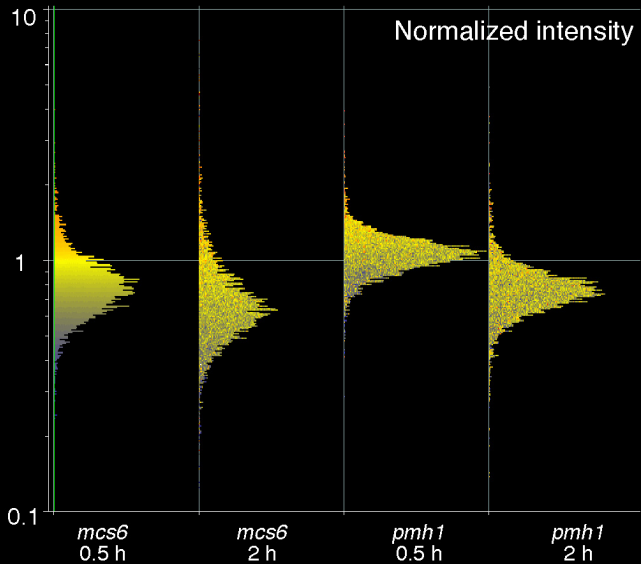

Supplement: mbc_E04-11-0982_1.pdf [file mbc_E04-11-0982_1.pdf]
